# Supplementary material for: Changes in Personal Exposure to Fine Particulate Matter (PM2.5) during the Spring 2020 COVID-19 Lockdown in the UK: Results of a Simulation Model
Source: MDPI journal article supplement (doi:10.3390/atmos13020273), 2022-02-05
Supplement: s1 [file s1]

Archive with 1 entries (1 files):
- atmosphere-1460692-supplementary.pdf
