# Supplementary material for: Changes in Personal Exposure to Fine Particulate Matter (PM2.5) during the Spring 2020 COVID-19 Lockdown in the UK: Results of a Simulation Model
Source: MDPI journal article supplement (doi:10.3390/atmos13020273), 2022-02-05
Supplement: s1 [file s1 › atmosphere-1460692-supplementary.pdf]

## Supplementary

**Table S1.** Mean PM<sub>2.5</sub> concentration by month and UK nation/English region. Geometric means were calculated for all regions and overall by month and year, and then the arithmetic mean calculated for each month in the analysis period in 2017–2019.

| Nation/Region            | Number of Monitors | Mean PM <sub>2.5</sub> (µg/m <sup>3</sup> ) |                  |            |             |
|--------------------------|--------------------|---------------------------------------------|------------------|------------|-------------|
|                          |                    | April 2017–2019                             | August 2017–2019 | April 2020 | August 2020 |
| East Midlands            | 5                  | 10.9                                        | 7.3              | 13.4       | 6.6         |
| Eastern                  | 4                  | 14.3                                        | 10.8             | 16.3       | 8.7         |
| London                   | 11                 | 14.9                                        | 9.4              | 16.1       | 7.9         |
| North East               | 5                  | 8.4                                         | 6.7              | 11.2       | 6.4         |
| North West               | 9                  | 11.3                                        | 6.2              | 12.2       | 6.0         |
| Northern Ireland         | 3                  | 8.0                                         | 4.7              | 11.7       | 4.6         |
| Scotland                 | 8                  | 6.6                                         | 4.2              | 8.7        | 4.4         |
| South East               | 10                 | 15.6                                        | 8.4              | 15.4       | 7.1         |
| South West               | 6                  | 17.3                                        | 7.0              | 13.0       | 5.9         |
| Wales                    | 7                  | 13.6                                        | 7.4              | 14.1       | 7.4         |
| West Midlands            | 8                  | 11.1                                        | 6.9              | 14.1       | 7.1         |
| Yorkshire and the Humber | 7                  | 10.8                                        | 7.0              | 13.6       | 7.6         |
| <i>Overall</i>           | 83                 | 11.9                                        | 7.2              | 13.3       | 6.6         |

**Table S2.** PM<sub>2.5</sub> peak height distributions for smoking and cooking episodes.

| Episode Type | Median PM <sub>2.5</sub> Peak Height (IQR), µg/m <sup>3</sup> | Mean PM <sub>2.5</sub> Peak Height (SD), µg/m <sup>3</sup> | Range, µg/m <sup>3</sup> |
|--------------|---------------------------------------------------------------|------------------------------------------------------------|--------------------------|
| Cooking      | 7 (4–30)                                                      | 38 (93)                                                    | 2–755                    |
| Smoking      | 116 (39–311)                                                  | 204 (208)                                                  | 25–1,121                 |
